# Supplementary material for: Effectiveness of De-Escalation in Reducing Aggression and Coercion in Acute Psychiatric Units. A Cluster Randomized Study
Source: PubMed Central journal article supplement (PMC9021532; doi:10.3389/fpsyt.2022.856153), 2022-04-07
Supplement: Data_Sheet_1.pdf [file Data_Sheet_1.pdf]

Supplement Table 1. Aggression and use of physical restraint in patients during baseline and intervention study periods.

| Patients <sup>1</sup>        | Experimental group |      | Control group |      | RR [95% CI]<br>Experimental/Control | p-value |
|------------------------------|--------------------|------|---------------|------|-------------------------------------|---------|
|                              | N                  | %    | N             | %    |                                     |         |
| All                          |                    |      |               |      |                                     |         |
| Baseline                     | 1251               |      | 1939          |      |                                     |         |
| Intervention                 | 1347               |      | 1864          |      |                                     |         |
| Aggressive behavior          |                    |      |               |      |                                     |         |
| Baseline                     | 176                | 14.1 | 251           | 12.9 | 1.087 [0.909; 1.300]                | *       |
| Intervention                 | 86                 | 6.4  | 267           | 14.3 | 0.446 [0.353; 0.562]                | **      |
| SOAS-R $\geq$ 9              |                    |      |               |      |                                     |         |
| Baseline                     | 145                | 11.6 | 207           | 10.7 | 1.086 [0.889; 1.326]                | *       |
| Intervention                 | 45                 | 3.3  | 212           | 11.4 | 0.294 [0.215; 0.402]                | **      |
| Restraints                   |                    |      |               |      |                                     |         |
| Baseline                     | 155                | 12.4 | 231           | 11.9 | 1.040 [0.859; 1.259]                | *       |
| Intervention                 | 100                | 7.4  | 213           | 11.4 | 0.650 [0.518; 0.815]                | **      |
| Restraints due to aggression |                    |      |               |      |                                     |         |
| Baseline                     | 124                | 9.9  | 169           | 8.7  | 1.137 [0.912; 1.418]                | *       |
| Intervention                 | 66                 | 4.9  | 180           | 9.7  | 0.507 [0.386; 0.667]                | **      |

RR, Risk ratio; p, statistical difference in the proportion of patients with aggression or restraints between the groups in each study period; \* no statistically significant difference (p-value of > 0.05); \*\* p-value of < 0.001.

<sup>1</sup>Patients refers to treatment episodes.

Supplement Table 2. The results of the regression analysis on the number of aggressive incidents during baseline and intervention study periods.

|                            | Coef.  | Std. Err. | p     | 95% CI           |
|----------------------------|--------|-----------|-------|------------------|
| <b>BASELINE PERIOD</b>     |        |           |       |                  |
| Constant                   | -3,301 | 0,211     | 0,000 | [-3,715; -2,887] |
| Intervention               | -0,082 | 0,099     | 0,403 | [-0,276; 0,111]  |
| Gender                     | -0,083 | 0,102     | 0,416 | [-0,283; 0,117]  |
| Involuntary                | 0,922  | 0,100     | 0,000 | [0,726; 1,119]   |
| Age                        | -0,015 | 0,003     | 0,000 | [-0,021; -0,008] |
| Comorbid F1                | -0,030 | 0,124     | 0,808 | [-0,273; 0,213]  |
| Dg F0                      | 0,796  | 0,186     | 0,000 | [0,432; 1,159]   |
| Dg F1                      | 0,644  | 0,166     | 0,000 | [0,320; 0,969]   |
| Dg F2                      | -0,014 | 0,133     | 0,915 | [-0,274; 0,246]  |
| Dg F6                      | 0,713  | 0,263     | 0,007 | [0,197; 1,228]   |
| Comorbid F6                | 0,339  | 0,153     | 0,026 | [0,040; 0,639]   |
| <b>INTERVENTION PERIOD</b> |        |           |       |                  |
| Constant                   | -3,322 | 0,229     | 0,000 | [-3,770; -2,874] |
| Intervention               | -1,150 | 0,124     | 0,000 | [-1,394; -0,906] |
| Gender                     | -0,190 | 0,111     | 0,087 | [-0,408; 0,028]  |
| Involuntary                | 0,989  | 0,111     | 0,000 | [0,772; 1,205]   |
| Age                        | -0,008 | 0,004     | 0,043 | [-0,015; 0,000]  |
| Comorbid F1                | 0,047  | 0,131     | 0,720 | [-0,210; 0,304]  |
| Dg F0                      | 0,205  | 0,207     | 0,323 | [-0,202; 0,611]  |
| Dg F1                      | 0,180  | 0,172     | 0,295 | [-0,157; 0,516]  |
| Dg F2                      | -0,368 | 0,134     | 0,006 | [-0,631; -0,106] |
| Dg F6                      | 1,179  | 0,290     | 0,000 | [0,610; 1,747]   |
| Comorbid F6                | 0,439  | 0,143     | 0,002 | [0,159; 0,720]   |

Supplement Table 3. The results of the regression analysis on the number of aggressive incidents in the experimental and control groups.

|                           | Coef.  | Std. Err. | p     | 95% CI           |
|---------------------------|--------|-----------|-------|------------------|
| <b>EXPERIMENTAL GROUP</b> |        |           |       |                  |
| Constant                  | -3,768 | 0,286     | 0,000 | [-4,328; -3,207] |
| Study period              | -0,904 | 0,130     | 0,000 | [-1,160; -0,648] |
| Gender                    | -0,329 | 0,131     | 0,012 | [-0,585; -0,072] |
| Involuntary               | 0,925  | 0,140     | 0,000 | [0,651; 1,198]   |
| Age                       | -0,005 | 0,005     | 0,302 | [-0,014; 0,004]  |
| Comorbid F1               | 0,403  | 0,149     | 0,007 | [0,112; 0,695]   |
| Dg F0                     | -0,096 | 0,276     | 0,728 | [-0,637; 0,445]  |
| Dg F1                     | 0,690  | 0,210     | 0,001 | [0,280; 1,101]   |
| Dg F2                     | 0,058  | 0,168     | 0,729 | [-0,272; 0,388]  |
| Dg F6                     | 1,555  | 0,328     | 0,000 | [0,912; 2,197]   |
| Comorbid F6               | 0,469  | 0,169     | 0,006 | [0,138; 0,801]   |
| <b>CONTROL GROUP</b>      |        |           |       |                  |
| Constant                  | -3,187 | 0,183     | 0,000 | [-3,545; -2,828] |
| Study period              | 0,182  | 0,086     | 0,033 | [0,015; 0,350]   |
| Gender                    | -0,092 | 0,092     | 0,317 | [-0,273; 0,089]  |
| Involuntary               | 0,933  | 0,087     | 0,000 | [0,762; 1,104]   |
| Age                       | -0,015 | 0,003     | 0,000 | [-0,021; -0,010] |
| Comorbid F1               | -0,188 | 0,113     | 0,095 | [-0,409; 0,033]  |
| Dg F0                     | 0,821  | 0,159     | 0,000 | [0,510; 1,132]   |
| Dg F1                     | 0,334  | 0,144     | 0,020 | [0,052; 0,616]   |
| Dg F2                     | -0,303 | 0,114     | 0,008 | [-0,527; -0,078] |
| Dg F6                     | 0,612  | 0,242     | 0,012 | [0,137; 1,087]   |
| Comorbid F6               | 0,353  | 0,133     | 0,008 | [0,091; 0,614]   |

Supplement Table 4. The results of the regression analysis on the number of physical restraints during baseline and intervention study periods.

|                        | Coef.  | Std. Err. | p     | 95% CI           |
|------------------------|--------|-----------|-------|------------------|
| <b>BASELINE PERIOD</b> |        |           |       |                  |
| Constant               | -3,349 | 0,220     | 0,000 | [-3,779; -2,918] |
| Intervention           | -0,101 | 0,105     | 0,333 | [-0,307; 0,104]  |
| Gender                 | -0,559 | 0,112     | 0,000 | [-0,779; -0,340] |
| Involuntary            | 1,051  | 0,105     | 0,000 | [0,844; 1,257]   |
| Age                    | -0,013 | 0,004     | 0,000 | [-0,020; -0,006] |
| Comorbid F1            | -0,250 | 0,137     | 0,068 | [-0,519; 0,018]  |
| Dg F0                  | 1,050  | 0,184     | 0,000 | [0,689; 1,412]   |
| Dg F1                  | 0,742  | 0,168     | 0,000 | [0,412; 1,072]   |
| Dg F2                  | -0,160 | 0,144     | 0,265 | [-0,442; 0,122]  |
| Dg F6                  | 0,515  | 0,305     | 0,091 | [-0,082; 1,113]  |
| Comorbid F6            | 0,198  | 0,165     | 0,231 | [-0,125; 0,520]  |

| INTERVENTION PERIOD |        |       |       |                  |
|---------------------|--------|-------|-------|------------------|
| Constant            | -3,441 | 0,251 | 0,000 | [-3,932; -2,950] |
| Intervention        | -0,648 | 0,124 | 0,000 | [-0,890; -0,406] |
| Gender              | -0,183 | 0,119 | 0,125 | [-0,417; 0,051]  |
| Involuntary         | 1,335  | 0,120 | 0,000 | [1,100; 1,569]   |
| Age                 | -0,015 | 0,004 | 0,000 | [-0,023; -0,007] |
| Comorbid F1         | 0,028  | 0,143 | 0,842 | [-0,251; 0,308]  |
| Dg F0               | 0,679  | 0,203 | 0,001 | [0,282; 1,077]   |
| Dg F1               | 0,386  | 0,184 | 0,036 | [0,025; 0,748]   |
| Dg F2               | -0,522 | 0,152 | 0,001 | [-0,819; -0,224] |
| Dg F6               | 1,479  | 0,282 | 0,000 | [0,926; 2,031]   |
| Comorbid F6         | 0,165  | 0,165 | 0,316 | [-0,157; 0,487]  |

Supplement Table 5. The results of the regression analysis on the number of physical restraints due to aggression during baseline and intervention study periods.

|                     | Coef.  | Std. Err. | p     | 95% CI           |
|---------------------|--------|-----------|-------|------------------|
| BASELINE PERIOD     |        |           |       |                  |
| Constant            | -3,727 | 0,255     | 0,000 | [-4,227; -3,227] |
| Intervention        | -0,028 | 0,120     | 0,817 | [-0,264; 0,208]  |
| Gender              | -0,387 | 0,127     | 0,002 | [-0,636; -0,138] |
| Involuntary         | 1,064  | 0,122     | 0,000 | [0,825; 1,304]   |
| Age                 | -0,014 | 0,004     | 0,000 | [-0,022; -0,006] |
| Comorbid F1         | -0,056 | 0,153     | 0,716 | [-0,355; 0,244]  |
| Dg F0               | 0,905  | 0,219     | 0,000 | [0,475; 1,335]   |
| Dg F1               | 0,710  | 0,195     | 0,000 | [0,328; 1,091]   |
| Dg F2               | -0,176 | 0,163     | 0,278 | [-0,495; 0,142]  |
| Dg F6               | 0,461  | 0,349     | 0,186 | [-0,222; 1,144]  |
| Comorbid F6         | 0,323  | 0,184     | 0,079 | [-0,038; 0,683]  |
| INTERVENTION PERIOD |        |           |       |                  |
| Constant            | -3,991 | 0,289     | 0,000 | [-4,557; -3,425] |
| Intervention        | -0,936 | 0,145     | 0,000 | [-1,221; -0,651] |
| Gender              | -0,248 | 0,136     | 0,069 | [-0,515; 0,019]  |
| Involuntary         | 1,235  | 0,135     | 0,000 | [0,971; 1,499]   |
| Age                 | -0,012 | 0,005     | 0,011 | [-0,021; -0,003] |
| Comorbid F1         | 0,054  | 0,160     | 0,736 | [-0,260; 0,368]  |
| Dg F0               | 0,723  | 0,240     | 0,003 | [0,252; 1,193]   |
| Dg F1               | 0,539  | 0,215     | 0,012 | [0,117; 0,961]   |
| Dg F2               | -0,211 | 0,176     | 0,233 | [-0,556; 0,135]  |
| Dg F6               | 1,659  | 0,324     | 0,000 | [1,024; 2,294]   |
| Comorbid F6         | 0,124  | 0,189     | 0,513 | [-0,247; 0,494]  |

Supplement Table 6. The results of the regression analysis on the number of physical restraints in the experimental and control groups.

|                           | Coef.  | Std. Err. | p     | 95% CI           |
|---------------------------|--------|-----------|-------|------------------|
| <b>EXPERIMENTAL GROUP</b> |        |           |       |                  |
| Constant                  | -3,842 | 0,288     | 0,000 | [-4,407; -3,276] |
| Study period              | -0,559 | 0,127     | 0,000 | [-0,808; -0,309] |
| Gender                    | -0,455 | 0,134     | 0,001 | [-0,718; -0,193] |
| Involuntary               | 1,158  | 0,139     | 0,000 | [0,884; 1,431]   |
| Age                       | -0,005 | 0,005     | 0,265 | [-0,014; 0,004]  |
| Comorbid F1               | 0,273  | 0,155     | 0,078 | [-0,030; 0,576]  |
| Dg F0                     | 0,433  | 0,240     | 0,071 | [-0,038; 0,903]  |
| Dg F1                     | 0,690  | 0,216     | 0,001 | [0,267; 1,113]   |
| Dg F2                     | -0,106 | 0,178     | 0,550 | [-0,455; 0,243]  |
| Dg F6                     | 1,610  | 0,331     | 0,000 | [0,962; 2,259]   |
| Comorbid F6               | 0,363  | 0,180     | 0,044 | [0,010; 0,716]   |
| <b>CONTROL GROUP</b>      |        |           |       |                  |
| Constant                  | -3,305 | 0,200     | 0,000 | [-3,696; -2,913] |
| Study period              | 0,020  | 0,093     | 0,834 | [-0,163; 0,202]  |
| Gender                    | -0,304 | 0,103     | 0,003 | [-0,506; -0,101] |
| Involuntary               | 1,108  | 0,095     | 0,000 | [0,922; 1,295]   |
| Age                       | -0,019 | 0,003     | 0,000 | [-0,026; -0,013] |
| Comorbid F1               | -0,321 | 0,128     | 0,012 | [-0,572; -0,070] |
| Dg F0                     | 1,264  | 0,167     | 0,000 | [0,937; 1,590]   |
| Dg F1                     | 0,664  | 0,155     | 0,000 | [0,361; 0,968]   |
| Dg F2                     | -0,271 | 0,132     | 0,040 | [-0,530; -0,012] |
| Dg F6                     | 0,496  | 0,286     | 0,082 | [-0,064; 1,056]  |
| Comorbid F6               | 0,074  | 0,155     | 0,631 | [-0,229; 0,377]  |

Supplement Table 7. The results of the regression analysis on the number of physical restraints due to aggression in the experimental and control groups.

|                           | Coef.  | Std. Err. | p     | 95% CI           |
|---------------------------|--------|-----------|-------|------------------|
| <b>EXPERIMENTAL GROUP</b> |        |           |       |                  |
| Constant                  | -4,010 | 0,331     | 0,000 | [-4,659; -3,361] |
| Study period              | -0,767 | 0,152     | 0,000 | [-1,065; -0,469] |
| Gender                    | -0,445 | 0,155     | 0,004 | [-0,750; -0,141] |
| Involuntary               | 1,272  | 0,159     | 0,000 | [0,961; 1,584]   |
| Age                       | -0,009 | 0,005     | 0,082 | [-0,020; 0,001]  |
| Comorbid F1               | 0,278  | 0,178     | 0,118 | [-0,070; 0,627]  |
| Dg F0                     | 0,033  | 0,309     | 0,914 | [-0,572; 0,639]  |
| Dg F1                     | 0,634  | 0,248     | 0,011 | [0,147; 1,121]   |
| Dg F2                     | -0,146 | 0,202     | 0,468 | [-0,542; 0,249]  |
| Dg F6                     | 1,678  | 0,366     | 0,000 | [0,960; 2,395]   |
| Comorbid F6               | 0,284  | 0,213     | 0,181 | [-0,132; 0,701]  |
| <b>CONTROL GROUP</b>      |        |           |       |                  |

|              |        |       |       |                  |
|--------------|--------|-------|-------|------------------|
| Constant     | -3,863 | 0,231 | 0,000 | [-4,315; -3,411] |
| Study period | 0,145  | 0,106 | 0,170 | [-0,062; 0,352]  |
| Gender       | -0,238 | 0,116 | 0,041 | [-0,465; -0,010] |
| Involuntary  | 1,038  | 0,108 | 0,000 | [0,828; 1,249]   |
| Age          | -0,016 | 0,004 | 0,000 | [-0,023; -0,008] |
| Comorbid F1  | -0,111 | 0,141 | 0,429 | [-0,387; 0,164]  |
| Dg F0        | 1,302  | 0,188 | 0,000 | [0,933; 1,672]   |
| Dg F1        | 0,657  | 0,178 | 0,000 | [0,308; 1,006]   |
| Dg F2        | -0,229 | 0,149 | 0,124 | [-0,521; 0,063]  |
| Dg F6        | 0,553  | 0,324 | 0,088 | [-0,083; 1,189]  |
| Comorbid F6  | 0,219  | 0,168 | 0,193 | [-0,111; 0,549]  |

Supplement Table 8. The results of the regression analysis on the number of incidents (all groups and study periods).

|                             | Coef.  | Std. Err. | p     | 95% CI           |
|-----------------------------|--------|-----------|-------|------------------|
| <b>AGGRESSIVE INCIDENTS</b> |        |           |       |                  |
| Constant                    | -3,260 | 0,158     | 0,000 | [-3,569; -2,950] |
| Study period                | -0,169 | 0,071     | 0,017 | [-0,308; -0,031] |
| Intervention                | -0,517 | 0,076     | 0,000 | [-0,666; -0,368] |
| Gender                      | -0,004 | 0,075     | 0,960 | [-0,151; 0,143]  |
| Involuntary                 | 0,928  | 0,074     | 0,000 | [0,783; 1,073]   |
| Age                         | -0,012 | 0,003     | 0,000 | [-0,017; -0,007] |
| Comorbid F1                 | 0,022  | 0,090     | 0,811 | [-0,156; 0,199]  |
| Dg F0                       | 0,580  | 0,138     | 0,000 | [0,310; 0,850]   |
| Dg F1                       | 0,519  | 0,119     | 0,000 | [0,285; 0,752]   |
| Dg F2                       | -0,159 | 0,095     | 0,094 | [-0,345; 0,027]  |
| Dg F6                       | 0,790  | 0,194     | 0,000 | [0,409; 1,170]   |
| Comorbid F6                 | 0,407  | 0,104     | 0,000 | [0,202; 0,612]   |
| <b>PHYSICAL RESTRAINT</b>   |        |           |       |                  |
| Constant                    | -3,362 | 0,169     | 0,000 | [-3,694; -3,031] |
| Study period                | -0,175 | 0,075     | 0,020 | [-0,323; -0,027] |
| Intervention                | -0,316 | 0,080     | 0,000 | [-0,472; -0,159] |
| Gender                      | -0,377 | 0,082     | 0,000 | [-0,538; -0,216] |
| Involuntary                 | 1,136  | 0,079     | 0,000 | [0,982; 1,291]   |
| Age                         | -0,014 | 0,003     | 0,000 | [-0,019; -0,009] |
| Comorbid F1                 | -0,124 | 0,099     | 0,210 | [-0,319; 0,070]  |
| Dg F0                       | 0,948  | 0,139     | 0,000 | [0,676; 1,221]   |
| Dg F1                       | 0,666  | 0,126     | 0,000 | [0,419; 0,913]   |
| Dg F2                       | -0,202 | 0,106     | 0,057 | [-0,411; 0,006]  |
| Dg F6                       | 0,774  | 0,218     | 0,000 | [0,347; 1,200]   |
| Comorbid F6                 | 0,202  | 0,117     | 0,083 | [-0,026; 0,431]  |
